# Supplementary material for: A human obesity-associated MC4R mutation with defective Gq/11α signaling leads to hyperphagia in mice
Source: PubMed Central journal article supplement (PMC10869179; doi:10.1172/jci165418), 2024-01-04

pERK1/2

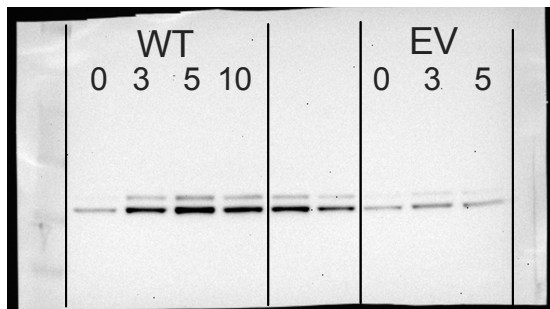

Stripped

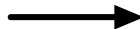

Total ERK1/2

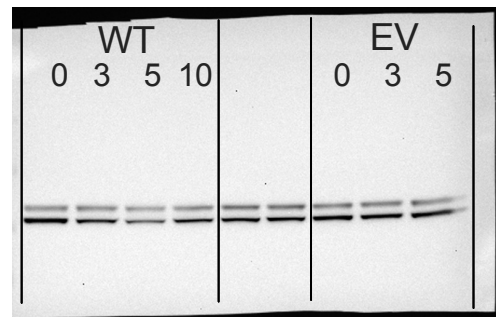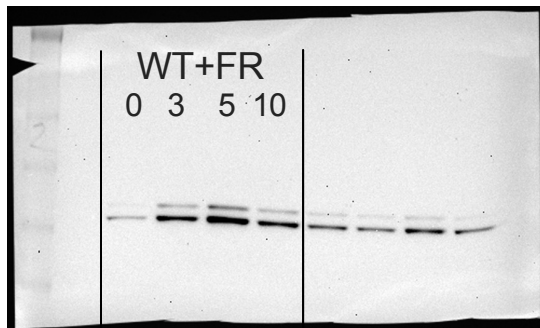

Stripped

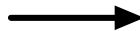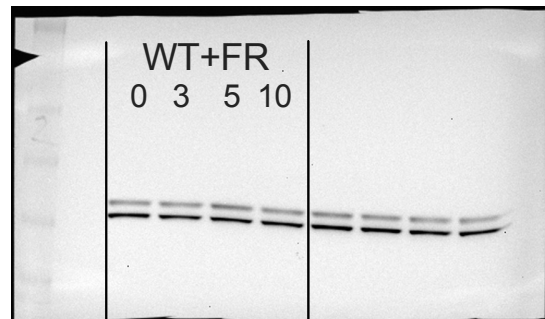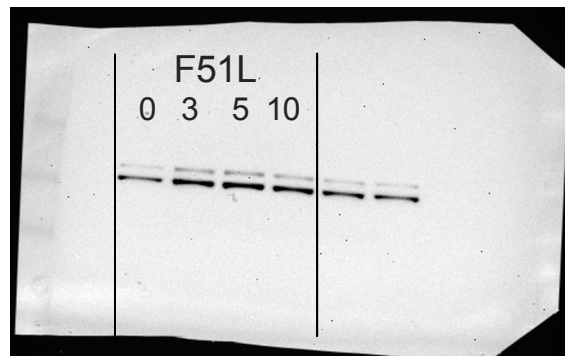

Stripped

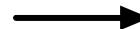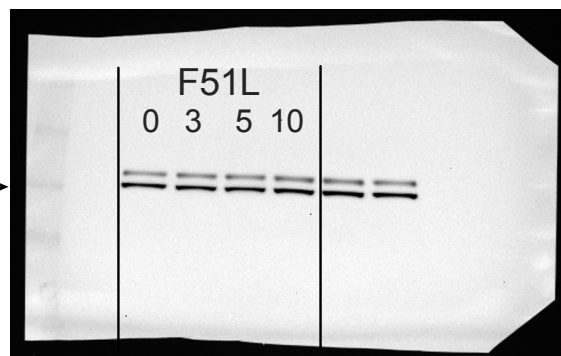

SF3B

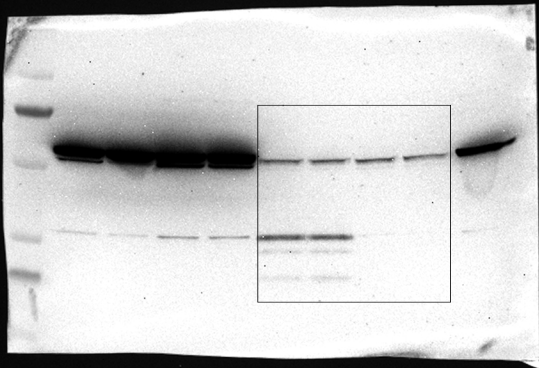

Supplement: jci-134-165418-s011.pdf [file jci-134-165418-s011.pdf]
